# Supplementary material for: Invasive Aspergillosis among Lung Transplant Recipients during Time Periods with Universal and Targeted Antifungal Prophylaxis—A Nationwide Cohort Study
Source: MDPI journal article supplement (doi:10.3390/jof9111079), 2023-11-04

# Supplementary material

**Table S1.** Detailed overview of ISHLT classification and specification of causative pathogens identified

|                                           | Universal prophylaxis period,<br>2010-2016 (IA N=27) | Targeted prophylaxis period,<br>2016-2019 (IA N=15) |
|-------------------------------------------|------------------------------------------------------|-----------------------------------------------------|
| <b><i>ISHLT classification, n (%)</i></b> |                                                      |                                                     |
| Proven pneumonia                          | 4 (15)                                               | 3 (20)                                              |
| Proven tracheobronchitis                  | 4 (15)                                               | 0                                                   |
| Proven anastomosis infection              | 3 (11)                                               | 4 (27)                                              |
| Probable pneumonia                        | 11 (41)                                              | 4 (27)                                              |
| Probable tracheobronchitis                | 5 (19)                                               | 1 (7)                                               |
| Probable anastomosis infection            | 0                                                    | 3 (20)                                              |
| <b><i>Pathogens specified, n (%)</i></b>  |                                                      |                                                     |
| <i>Aspergillus fumigatus</i>              | 18 (67)                                              | 11 (73)                                             |
| <i>Aspergillus niger</i>                  | 2 (7)                                                | 0                                                   |
| Unspecified mold                          | 1 (4)                                                | 2 (13)                                              |
| <i>Aspergillus</i> species                | 3 (11)                                               | 0                                                   |
| <i>Aspergillus nidulans</i>               | 1 (4)                                                | 0                                                   |
| <i>Aspergillus unguis</i>                 | 1 (4)                                                | 0                                                   |
| No pathogen specified                     | 3 (11)                                               | 2 (13)                                              |

No pathogen was specified in some patients with a proven diagnosis where the diagnosis relied on histopathological findings exclusively.

Abbreviations: Universal antifungal prophylaxis period = Voriconazole three months following transplantation for all patients; Targeted antifungal prophylaxis = Posaconazole and inhaled liposomal amphotericin B three months following transplantation for high IA risk patients; IA = invasive aspergillosis; ISHLT = International Society for Heart and Lung Transplantation.

**Table S2.** Adjusted hazard ratios (aHR) of first *Aspergillus* event (colonization or invasive aspergillosis) in lung transplant recipients

|                                                     | aHR (95% CI)     |
|-----------------------------------------------------|------------------|
| <b>Model 1</b>                                      |                  |
| <b>Targeted prophylaxis time period, 2016-2019</b>  | Ref.             |
| <b>Universal prophylaxis time period, 2010-2016</b> | 0.92 (0.58-1.48) |
| <b>Model 2</b>                                      |                  |
| <b>Person time without antifungal prophylaxis</b>   | Ref.             |
| <b>Person time on antifungal prophylaxis</b>        | 0.50 (0.24-1.00) |

Multivariable Cox models on invasive aspergillosis (IA), Model 1 and 2 included the following variables: Sex, age >50 years, *Aspergillus* pre-transplantation, high risk of IA, single lung transplantation and prophylaxis guideline period. Model 2 also included person time on prophylaxis as a time-updated variable.

**Figure S1.** Cumulative hazards of first *Aspergillus* event (colonization or invasive aspergillosis) the first year after lung transplantation in time periods with universal versus targeted prophylaxis

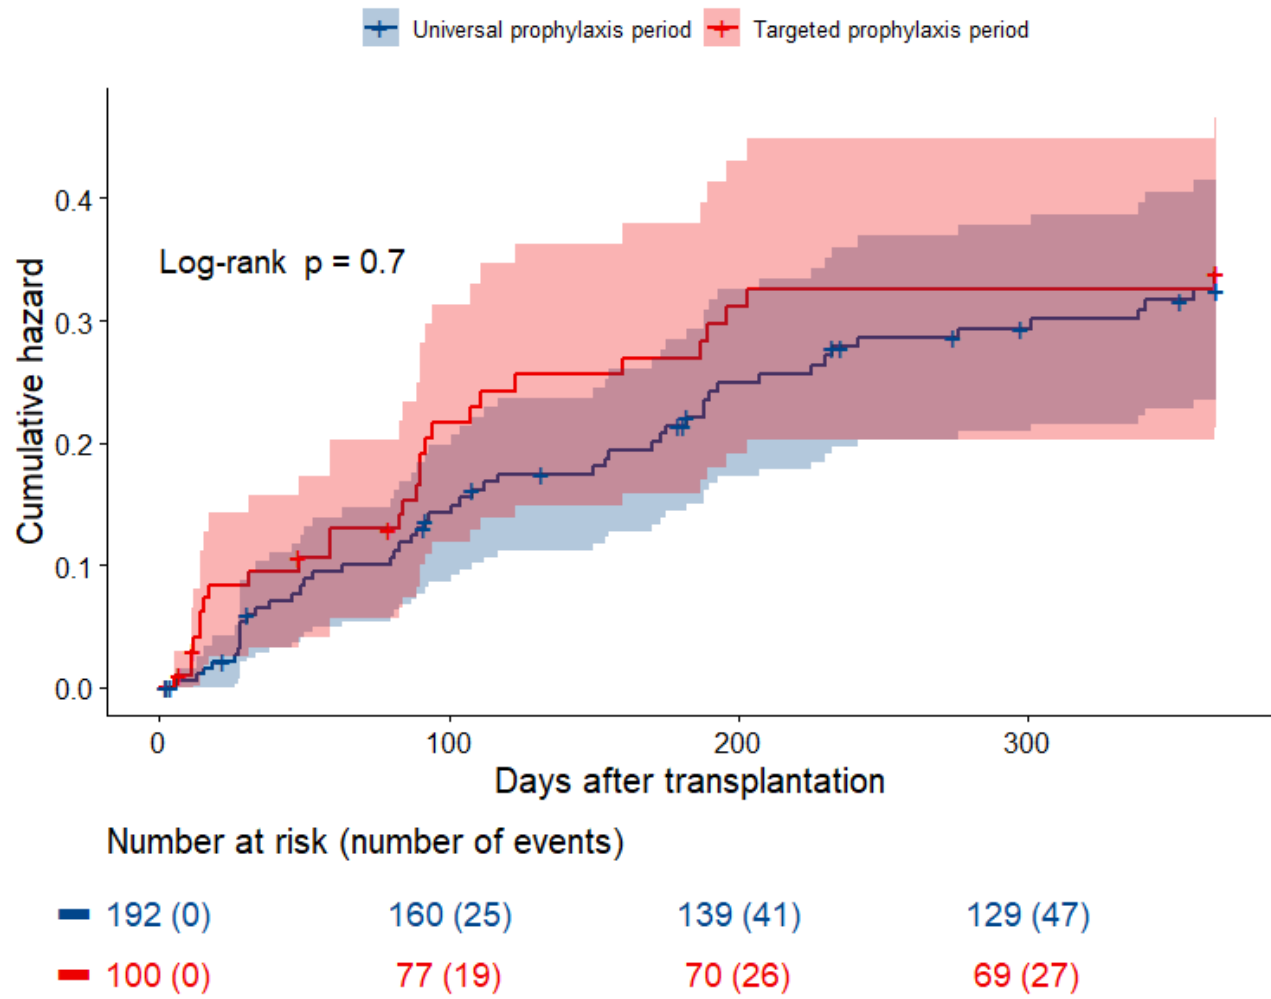

Supplement: s1 [file s1]
